# Supplementary material
Source: PubMed Central journal article supplement (PMC3457771)
Supplement: supp_mss119_MSS119_mbe976_S1_alignment.pdf [file supp_mss119_MSS119_mbe976_S1_alignment.pdf]

## Alignment of T7 gene 10A, wt and designed variants

Changes from preferred to non-preferred codons are highlighted.

|                      |                                                               |     |                          |    |
|----------------------|---------------------------------------------------------------|-----|--------------------------|----|
| T7 gene 10A wt       | ATGGCTAGCATGACTGGTGGACAGCAAATGGGTA                            | CTA | AACCAAGGTAAAGGTGTAGTTGCT | 60 |
| T7 gene 10A Fop=0.50 | ATGGCTAGCATGACTGGTGGACAGCAAATGGGTA                            | CTA | AACCAAGGTAAAGGTGTAGTTGCT | 60 |
| T7 gene 10A Fop=0.30 | ATGGCTAGCATGACTGGTGGACAGCAAATGGGTA                            | CTA | AACCAAGGTAAAGGTGTAGTTGCT | 60 |
| T7 gene 10A Fop=0.20 | ATGGCTAGCATGACTGGTGGACAGCAAATGGGTA                            | CTA | AACCAAGGTAAAGGTGTAGTTGCT | 60 |
| T7 gene 10A Fop=0.10 | ATGGCTAGCATGACTGGTGGACAGCAAATGGGTA                            | CTA | AACCAAGGTAAAGGTGTAGTTGCT | 60 |
|                      |                                                               |     |                          |    |
| T7 gene 10A wt       | GCTGGAGATAAACTGGCGTTGTTCTTGAAGGTATTTGGCGGTGAAGTCCTGACTGCGTTC  | 120 |                          |    |
| T7 gene 10A Fop=0.50 | GCTGGAGATAAACTGGCGTTGTTCTTGAAGGTATTTGGCGGTGAAGTCCTGACTGCGTTC  | 120 |                          |    |
| T7 gene 10A Fop=0.30 | GCTGGAGATAAACTGGCGTTGTTCTTGAAGGTATTTGGCGGTGAAGTCCTGACTGCGTTC  | 120 |                          |    |
| T7 gene 10A Fop=0.20 | GCTGGAGATAAACTGGCGTTGTTCTTGAAGGTATTTGGCGGTGAAGTCCTGACTGCGTTC  | 120 |                          |    |
| T7 gene 10A Fop=0.10 | GCTGGAGATAAACTGGCGTTGTTCTTGAAGGTATTTGGCGGTGAAGTCCTGACTGCGTTC  | 120 |                          |    |
|                      |                                                               |     |                          |    |
| T7 gene 10A wt       | GCTCGTACCTCCGTGACCACTTCTCGCCACATGGTACGTTCCATCTCCAGCGGTAAATCC  | 180 |                          |    |
| T7 gene 10A Fop=0.50 | GCTCGTACCTCCGTGACCACTTCTCGCCACATGGTACGTTCCATCTCCAGCGGTAAATCC  | 180 |                          |    |
| T7 gene 10A Fop=0.30 | GCTCGTACCTCCGTGACCACTTCTCGCCACATGGTACGTTCCATCTCCAGCGGTAAATCC  | 180 |                          |    |
| T7 gene 10A Fop=0.20 | GCTCGTACCTCCGTGACCACTTCTCGCCACATGGTACGTTCCATCTCCAGCGGTAAATCC  | 180 |                          |    |
| T7 gene 10A Fop=0.10 | GCTCGTACCTCCGTGACCACTTCTCGCCACATGGTACGTTCCATCTCCAGCGGTAAATCC  | 180 |                          |    |
|                      |                                                               |     |                          |    |
| T7 gene 10A wt       | GCTCAGTTCCTGTTCTGGGTCGCACTCAGGCAGCGTATCTGGCTCCGGGCGAGAACCTC   | 240 |                          |    |
| T7 gene 10A Fop=0.50 | GCTCAGTTCCTGTTCTGGGTCGCACTCAGGCAGCGTATCTGGCTCCGGGCGAGAACCTC   | 240 |                          |    |
| T7 gene 10A Fop=0.30 | GCTCAGTTCCTGTTCTGGGTCGCACTCAGGCAGCGTATCTGGCTCCGGGCGAGAACCTC   | 240 |                          |    |
| T7 gene 10A Fop=0.20 | GCTCAGTTCCTGTTCTGGGTCGCACTCAGGCAGCGTATCTGGCTCCGGGCGAGAACCTC   | 240 |                          |    |
| T7 gene 10A Fop=0.10 | GCTCAGTTCCTGTTCTGGGTCGCACTCAGGCAGCGTATCTGGCTCCGGGCGAGAACCTC   | 240 |                          |    |
|                      |                                                               |     |                          |    |
| T7 gene 10A wt       | GACGATAAACGTAAGGACATCAAACACACCCGAGAAGGTAATCACCATTGACGGTCTCCTG | 300 |                          |    |
| T7 gene 10A Fop=0.50 | GACGATAAACGTAAGGACATCAAACACACCCGAGAAGGTAATCACCATTGACGGTCTCCTG | 300 |                          |    |
| T7 gene 10A Fop=0.30 | GACGATAAACGTAAGGACATCAAACACACCCGAGAAGGTAATCACCATTGACGGTCTCCTG | 300 |                          |    |
| T7 gene 10A Fop=0.20 | GACGATAAACGTAAGGACATCAAACACACCCGAGAAGGTAATCACCATTGACGGTCTCCTG | 300 |                          |    |
| T7 gene 10A Fop=0.10 | GACGATAAACGTAAGGACATCAAACACACCCGAGAAGGTAATCACCATTGACGGTCTCCTG | 300 |                          |    |
|                      |                                                               |     |                          |    |
| T7 gene 10A wt       | ACGGCTGACGTTCTGATTTATGATATTGAGGACGCGATGAACCACTACGACGTTTCGCTCT | 360 |                          |    |
| T7 gene 10A Fop=0.50 | ACGGCTGACGTTCTGATTTATGATATTGAGGACGCGATGAACCACTACGACGTTTCGCTCT | 360 |                          |    |
| T7 gene 10A Fop=0.30 | ACGGCTGACGTTCTGATTTATGATATTGAGGACGCGATGAACCACTACGACGTTTCGCTCT | 360 |                          |    |
| T7 gene 10A Fop=0.20 | ACGGCTGACGTTCTGATTTATGATATTGAGGACGCGATGAACCACTACGACGTTTCGCTCT | 360 |                          |    |
| T7 gene 10A Fop=0.10 | ACGGCTGACGTTCTGATTTATGATATTGAGGACGCGATGAACCACTACGACGTTTCGCTCT | 360 |                          |    |

|                      |                                                                |     |
|----------------------|----------------------------------------------------------------|-----|
| T7 gene 10A wt       | GAGTATACCTCTCAGTTGGGTGAATCTCTGGCGATGGCTGCGGATGGTGCGGTTCTGGCT   | 420 |
| T7 gene 10A Fop=0.50 | GAGTATACCTCTCAGTTGGGTGAATCTTTAGCGATGGCAGCGGATGGTGCGGTGCTAGCC   | 420 |
| T7 gene 10A Fop=0.30 | GAGTATACCTCTCAATTGGGTGAAAGCTTAGCGATGGCAGCGGATGGTGCGGTGCTAGCC   | 420 |
| T7 gene 10A Fop=0.20 | GAGTATACCTCTCAATTGGGTGAAAGCTTAGCGATGGCAGCGGATGGAGCGGTGCTAGCC   | 420 |
| T7 gene 10A Fop=0.10 | GAGTATACCAGCCAATTGGGAGAGAGCTTAGCGATGGCAGCGGATGGAGCGGTGCTAGCC   | 420 |
|                      |                                                                |     |
| T7 gene 10A wt       | GAGATTGCCGGTCTGTGTAACGTGGAAAGCAAATATAATGAGAACATCGAGGGCTTAGGT   | 480 |
| T7 gene 10A Fop=0.50 | GAGATTGCCGGTCTGTGTAACGTGGAGAGCAAATATAATGAGAATATCGAGGGCTTAGGT   | 480 |
| T7 gene 10A Fop=0.30 | GAGATTGCCGGTCTGTGTAACGTGGAGAGCAAATATAATGAGAATATCGAGGGCTTAGGT   | 480 |
| T7 gene 10A Fop=0.20 | GAGATTGCCGGGTTGTGTAAATGTGGAGAGCAAATATAATGAGAATATAGAGGGCTTAGGT  | 480 |
| T7 gene 10A Fop=0.10 | GAGATTGCCGGGTTGTGTAAATGTGGAGAGCAAATATAATGAGAATATAGAGGGCTTAGGA  | 480 |
|                      |                                                                |     |
| T7 gene 10A wt       | ACTGCTACCGTAATTGAGACCACTCAGAACAAGGCCGCACTTACCGACCAAGTTGCGCTG   | 540 |
| T7 gene 10A Fop=0.50 | ACAGCAACCGTAATTGAGACCACTCAGAACAAGGCCGCACTTACCGACCAAGTTGCGTTG   | 540 |
| T7 gene 10A Fop=0.30 | ACAGCAACAGTAATTGAGACCACTCAAAATAAGGCCGCACTTACCGACCAAGTCGCGTTG   | 540 |
| T7 gene 10A Fop=0.20 | ACAGCAACAGTAATTGAGACGACTCAAAATAAGGCCGCACTTACCGACCAAGTCGCGTTG   | 540 |
| T7 gene 10A Fop=0.10 | ACAGCAACAGTGATTGAGACGACACAAAATAAGGCCGCACTTACCGACCAAGTCGCGTTG   | 540 |
|                      |                                                                |     |
| T7 gene 10A wt       | GGTAAGGAGATTATTGCGGCTCTGACTAAGGCTCGTGCGGCTCTGACCAAGAAGTATGTT   | 600 |
| T7 gene 10A Fop=0.50 | GGAAAGGAGATTATTGCGGCCCTGACTAAGGCCCGTGCGGCTCTCACCAAGAAGTATGTT   | 600 |
| T7 gene 10A Fop=0.30 | GGAAAGGAGATTATTGCGGCCCTCACAAAGGCCCGTGCGGCGCTCACCAAGAAGTATGTG   | 600 |
| T7 gene 10A Fop=0.20 | GGAAAGGAGATTATTGCGGCCCTCACAAAGGCCCGTGCGGCGCTCACCAAGAATTATGTG   | 600 |
| T7 gene 10A Fop=0.10 | GGAAAGGAGATTATTGCGGCCCTCACAAAGGCCCGAGCGGCGCTCACCAAGAATTATGTG   | 600 |
|                      |                                                                |     |
| T7 gene 10A wt       | CCGGCTGCTGACCGTGTGTTCTACTGTGACCCAGATAGCTACTCTGCGATTCTGGCAGCA   | 660 |
| T7 gene 10A Fop=0.50 | CCCGCGGCGGACCGTGTGTTCTATTGTGACCCAGATAGCTACTCTGCGATTCTGGCAGCA   | 660 |
| T7 gene 10A Fop=0.30 | CCCGCGGCGGATAGGGTGTTTTATTGTGACCCAGATAGCTATTCTGCGATTTTAGCAGCA   | 660 |
| T7 gene 10A Fop=0.20 | CCCGCGGCGGATAGGGTGTTTTATTGTGACCCAGATAGCTATTCTGCGATTTTAGCAGCA   | 660 |
| T7 gene 10A Fop=0.10 | CCCGCGGCGGATAGGGTGTTTTATTGTGATCCAGATAGCTATAGCGCGATTTTAGCAGCA   | 660 |
|                      |                                                                |     |
| T7 gene 10A wt       | CTGATGCCGAACGCAGCAAACACTACGCTGCTCTGATTGACCCTGAGAAGGGTTCTATCCGC | 720 |
| T7 gene 10A Fop=0.50 | CTAATGCCTAACGCAGCAAACACTATGCAGCTCTGATTGACCCTGAGAAGGGTTCTATCCGC | 720 |
| T7 gene 10A Fop=0.30 | CTAATGCCTAACGCAGCAAATTATGCAGCTCTGATTGACCCTGAGAAGGGTTTCGATCCGC  | 720 |
| T7 gene 10A Fop=0.20 | CTAATGCCTAATGCAGCAAATTATGCAGCTTTGATTGATCCTGAGAAGGGTTCGATACGA   | 720 |
| T7 gene 10A Fop=0.10 | CTAATGCCTAATGCAGCAAATTATGCAGCATTGATTGATCCTGAGAAGGGTTCGATACGA   | 720 |
|                      |                                                                |     |
| T7 gene 10A wt       | AACGTTATGGGCTTTGAGGTTGTAGAAGTTCGACCTCACCGCTGGTGGTGCTGGTACC     | 780 |
| T7 gene 10A Fop=0.50 | AACGTTATGGGCTTTGAGGTTGTGGAAGTTCGACCTCACCGCTGGTGGTGCTGGAACG     | 780 |
| T7 gene 10A Fop=0.30 | AACGTCATGGGTTTTGAGGTTGTGGAGGTTCCGCATCTCACAGCAGGTGGTGCTGGAACG   | 780 |
| T7 gene 10A Fop=0.20 | AACGTCATGGGTTTTGAGGTCGTGGAGGTTCCGCATCTCACAGCAGGTGGGGCTGGAACG   | 780 |
| T7 gene 10A Fop=0.10 | AATGTCATGGGTTTTGAGGTCGTGGAGGTTCCCATCTCACAGCAGGGGGGCTGGAACG     | 780 |

|                      |                                                               |      |
|----------------------|---------------------------------------------------------------|------|
| T7 gene 10A wt       | GCTCGTGAGGGCACTACTGGTCAGAAGCACGTCTTCCCTGCCAATAAAGGTGAGGGTAAT  | 840  |
| T7 gene 10A Fop=0.50 | GCAAGGGAGGGCACGACTGGACAGAAGCACGTCTTCCCTGCCAATAAAGGTGAGGGTAAT  | 840  |
| T7 gene 10A Fop=0.30 | GCAAGGGAGGGCACGACTGGACAGAAGCACGTCTTCCCTGCCAATAAAGGTGAGGGGAAT  | 840  |
| T7 gene 10A Fop=0.20 | GCAAGGGAGGGGACGACTGGACAAAAGCATGTCTTCCCTGCCAATAAAGGTGAGGGGAAT  | 840  |
| T7 gene 10A Fop=0.10 | GCAAGGGAGGGGACGACTGGACAAAAGCATGTCTTTTCTGCCAATAAAGGGGAGGGGAAT  | 840  |
|                      |                                                               |      |
| T7 gene 10A wt       | GTCAAGGTTGCTAAGGACAACGTTATCGGCCTGTTTCATGCACCGCTCTGCGGTAGGTACT | 900  |
| T7 gene 10A Fop=0.50 | GTCAAGGTTGCTAAGGACAATGTTATCGGCCTGTTTCATGCACCGCTCTGCGGTGGGTACT | 900  |
| T7 gene 10A Fop=0.30 | GTCAAGGTTGCCAAGGATAATGTTATCGGCCTGTTTCATGCACCGCAGCGCGGTGGGGACA | 900  |
| T7 gene 10A Fop=0.20 | GTCAAGGTCGCCAAGGATAATGTGATAGGCCTGTTTCATGCACCGCAGCGCGGTGGGGACA | 900  |
| T7 gene 10A Fop=0.10 | GTCAAGGTCGCCAAGGATAATGTGATAGGATTGTTTCATGCACCGAAGCGCGGTGGGGACA | 900  |
|                      |                                                               |      |
| T7 gene 10A wt       | GTTAAGCTGCGTGACTTGGCTCTGGAGCGCGCTCGCCGTGCTAACTTCCAAGCGGACCAG  | 960  |
| T7 gene 10A Fop=0.50 | GTTAAGCTGCGTGACTTGGCTTTGGAGCGCGCTCGCCGAGCTAACTTCCAAGCGGATCAG  | 960  |
| T7 gene 10A Fop=0.30 | GTCAAGCTAAGAGATTTGGCTTTGGAGCGGGCGCGCCGAGCTAATTTTCAAGCGGATCAG  | 960  |
| T7 gene 10A Fop=0.20 | GTCAAGCTAAGAGATTTGGCGTTGGAGCGGGCGCGCCGAGCTAATTTTCAAGCGGATCAG  | 960  |
| T7 gene 10A Fop=0.10 | GTCAAGCTAAGAGATTTGGCGTTGGAGCGGGCGCGACGAGCTAATTTTCAAGCGGATCAA  | 960  |
|                      |                                                               |      |
| T7 gene 10A wt       | ATTATCGCTAAGTACGCAATGGGCCACGGTGGTCTTCGCCCAGAAGCTGCTGGTGCAGTG  | 1020 |
| T7 gene 10A Fop=0.50 | ATTATAGCCAAGTACGCAATGGGCCACGGTGGTCTTCGCCCAGAAGCTGCTGGTGCAGTG  | 1020 |
| T7 gene 10A Fop=0.30 | ATTATAGCCAAGTACGCAATGGGACACGGTGGTCTTCGCCCAGAAGCTGCTGGTGCAGTG  | 1020 |
| T7 gene 10A Fop=0.20 | ATTATAGCCAAGTACGCAATGGGACATGGGGGTCTTCGCCCAGAAGCTGCTGGTGCAGTG  | 1020 |
| T7 gene 10A Fop=0.10 | ATTATAGCCAAGTATGCAATGGGACATGGGGGGCTTCGCCCAGAAGCTGCTGGTGCAGTG  | 1020 |
|                      |                                                               |      |
| T7 gene 10A wt       | GTTTTCAAAGTGGAGTAA                                            | 1038 |
| T7 gene 10A Fop=0.50 | GTTTTCAAAGTGGAGTAA                                            | 1038 |
| T7 gene 10A Fop=0.30 | GTTTTCAAAGTGGAGTAA                                            | 1038 |
| T7 gene 10A Fop=0.20 | GTTTTCAAAGTGGAGTAA                                            | 1038 |
| T7 gene 10A Fop=0.10 | GTTTTCAAAGTGGAGTAA                                            | 1038 |
